# Supplementary material for: Aptian-Albian clumped isotopes from northwest China: Cool temperatures, variable atmospheric p CO 2 and regional shifts in hydrologic cycle
Source: Copernicus journal article supplement (doi:10.5194/cp-2020-152), 2020-12-21
Supplement: Supplementary file 1 [file Harperetal_Aptian-Albian_Clumped_CP_Tables.xlsx]

## Sheet: Table 1
Table 1. Primary carbonate stable isotope data measured at KU (δ13C and δ18O) and CU Boulder (Δ47, δ13C and δ18O) for White Pagoda Site.
Δδ13C calculated with δ13Corg of Suarez et al. (2018).
	Composite section			δ13C mean	δ18O mean	δ13C 1sd	δ18O 1sd	δ13Corg (Suarez et al., 2018)	Δδ13C (δ13Ccarb- δ13Corg)
Sample	(meters above base)	microfacies	n	(‰ VPDB)	(‰ VPDB)	(‰ VPDB)	(‰ VPDB)	(‰ VPDB)	(‰ VPDB)
3-021	8.75	(i)	6	-6.262	-10.8941	0.162086	0.181432	-23.14	16.6498
3A-097	58.75	(i)	9	-7.01563	-9.16416	0.321319	0.0794442	-22.55	15.5344
3B-021	74.5	(ii)	8	-3.85586	-6.68771	0.0607645	0.0454435	-27.48	23.6241
3E-001	103	(ii)	7	-6.44534	-11.1212	0.12047	0.21274	-21.59	14.992
3F-019	111.25	mix of (i) & (ii)	9	-7.4482	-10.189	0.10372	0.187238	-22.1119	14.6637
3H-014	123	(i)	7	-6.33089	-8.42516	0.154152	0.215909	-21	14.6691
6-003	141	(ii)	9	-7.06932	-10.3526	0.312787	0.275109	-25.04	17.9707
6-042	150.9	(ii)	11	-6.36162	-9.46362	0.27029	0.272325	-21.97	15.6084
4-038	209.85	(i)	6	-7.60502	-10.2138	0.0857698	0.112716	-25.3274	17.7224

## Sheet: Table 2
Table 2. Primary carbonate stable isotope data measured at CU Boulder (Δ47, δ13C and δ18O) for White Pagoda. Clumped isotopes and interpreted temperatures
follow Petersen et al. (2019). Meteroic water δ18O calculated from δ18Ocarb (CU Boulder measured) and clumped temperatures, following Friedman and O'Neil (1977).
	Composite section		δ13C mean	δ18O mean	δ13C 1sd	δ18O 1sd	Δ47 mean	Δ47 1sd	T	T 1sd	δ18Owater	δ18Owater 1sd
Sample	(meters above base)	n	(‰ VPDB)	(‰ VPDB)	(‰ VPDB)	(‰ VPDB)	(‰)	(‰)	(ºC)	(ºC)	(‰ SMOW)	(‰ SMOW)
3-021	8.75	4	-5.95353	-10.9913	0.0804665	0.163726	0.731379	0.0159696	11.4	4.76445	-11.4869	1.21267
3A-097	58.75	3	-6.75574	-9.30168	0.0256189	0.171291	0.7165	0.00882597	15.9	2.77849	-8.82092	0.765731
3B-021	74.5	4	-3.6667	-6.98227	0.0401293	0.399225	0.719288	0.00736439	15	2.31661	-6.69392	0.899052
3E-001	103	4	-5.98259	-10.9827	0.115143	0.341569	0.732429	0.0136141	11.1	4.03361	-11.5445	1.23124
3F-019	111.25	4	-7.04714	-10.3797	0.0682748	0.311815	0.719348	0.0137013	15.1	4.28826	-10.0708	1.23327
3H-014	123	4	-5.94858	-8.63271	0.0801805	0.173935	0.716699	0.0109032	15.9	3.45012	-8.15163	0.912581
6-003	141	4	-6.85624	-10.3159	0.0164171	0.134141	0.707373	0.0066303	18.8	2.19393	-9.22189	0.594123
6-042	150.9	4	-6.26588	-9.60162	0.0220208	0.304277	0.722983	0.0210137	14	6.25193	-9.52989	1.65894
4-038	209.85	4	-7.23714	-10.3163	0.0409179	0.131117	0.714918	0.0138143	16.5	4.38824	-9.70804	1.0653

## Sheet: Table 3
Table 3. Lithologic and CALMAG (see text for details) data, with interpreted mean annual
precipiation (MAP) for Site WP2011 samples. All samples derived from "B" paleosol horizons.
	Composite section		CALMAG	MAP
Sample	(meters above base)	Lithology	(%)	(mm/yr; CALMAG)
3-021	8.75	mudstone	55.4481	822.317
3-035	12.25	mudstone	47.9134	651.355
3-036	12.5	fine sandstone	50.086	700.651
3-043	14.25	mudstone	54.0041	789.552
3A-069	50.5	mudstone	40.4093	481.086
3A-071	51	mudstone	43.5166	551.591
3A-085	55.75	mudstone	43.5852	553.148
3A-091	57.25	mudstone	62.555	983.573
3A-097	58.75	mudstone	43.1451	543.162
3A-100	59.5	mudstone	53.954	788.416
3B-009	71.5	mudstone	61.9116	968.974
3B-014	72.75	mudstone	62.2129	975.812
3B-023	75	mudstone	45.0302	585.934
3B-024	75.25	mudstone	43.0908	541.93
3E-010	105.25	mudstone	43.3401	547.586
3F-001	106.5	mudstone	41.6505	509.25
3F-015	110.25	mudstone	54.5768	802.548
3G-003	116.75	mudstone	45.4759	596.049
3H-001	119.75	mudstone	50.1008	700.986
3H-007	121.25	mudstone	57.409	866.81
3H-010	122	mudstone	60.3533	933.616
3H-014	123	claystone	55.1397	815.319
6-003	141	silty mudstone	48.4168	662.776
6-014	143.75	sandy siltstone	44.1433	565.812
6-030	147.9	mudstone	53.0402	767.681
6-035	149.15	mudstone	52.9208	764.973
6-042	150.9	carb. mudstone	41.9857	516.856
6-047	152.15	carb. mudstone	53.2012	771.335
4-042	210.85	mudstone	40.1715	475.691
4-077	219.95	mudstone	49.919	696.862
4-081	220.95	muddy sandstone	51.7431	738.25
4-085	221.95	muddy sandstone	58.5216	892.056

## Sheet: Table 4
Table 4. Atmospheric pCO2 calculated using δ13Cs (from δ13Ccarb with temperature-dependent enrichment factor; Romanek et al., 1992; 1 sd uncertainty in δ13Ccarb and temperature propogated [pCO2 + and pCO2 –]; pCO2 +*
and pCO2 –* indicate prior propagated uncertainty and uncertainty in S(z) [see text]), δ13Ca (average Atlantic bulk carbonate for C isotope segements following Bralower et al., 1999 with DIC-atmosphere fractionation of -8.23‰),
δ13Cr (from organic C record of Suarez et al., 2018), and S(z) (estimated from MAP following Cotton and Sheldon, 2012) .
	Composite section	δ13Cs	δ13Cs uncertainty	C isotope segment	δ13Ca	δ13Cr	S(z)	pCO2	pCO2 +	pCO2 –	pCO2 +*	pCO2 –*
Sample	(meters above base)	(‰ VPDB)	(+/-; ‰ VPDB)	(i.e., Bralower et al., 1999)	(‰ VPDB)	(‰ VPDB)	(MAP-derived)	(ppmv)	(ppmv)	(ppmv)	(ppmv)	(ppmv)
3-021	8.75	-16.874	0.73382	C6	-4.28	-23.14	4392.64	686.35	314.25	279.645	522.989	454.88
3A-097	58.75	-17.0876	0.654738	C8	-4.38	-22.55	2809.83	256.843	166.588	150.263	543.204	162.015
3E-001	103	-17.0933	0.604503	C10	-4.18	-21.59	2834.91	42.0757	141.293	128.656	301.322	204.216
3F-019	111.25	-17.6162	0.618312	C10	-4.28	-22.1119	4280.55	61.9373	211.121	192.412	276.726	223.76
3H-014	123	-16.4029	0.568166	C11	-4.18	-21	4352.96	103.103	217.232	197.934	287.587	218.762
6-003	141	-16.7933	0.576058	C12	-4.43	-25.04	3488.04	1116.34	225.022	204.986	925.29	463.141
6-042	150.9	-16.6616	1.02052	C12	-4.38	-21.97	2660.67	217.732	260.852	220.827	737.215	223.908
4-038	209.85	-17.605	0.612359	C15	-5.38	-25.3274	2427.27	681.789	163.947	148.306	1168.03	132.32

## Sheet: Table S1
Table S1. Aptian-Albian Asian site locations with mean δ18Ow and temperature data. Some site locations estimated if exact coordinates are not given (italics). Three different paleogeographical reconstructions are shown.
		Site location		Age		δ18Ow	δ18Ow 1sd	T	T 1sd	Paleolatitude (Amiot et al., 2011)			Paleogeog. (Gplates; Matthews et al., 2016)		Paleolatitude (paleolatitude.org; Torsvik et al., 2012)
Formation	Data reference	latitude (ºN)	longitude (ºE)	(approx.)	(Ma; approx.)	(‰ SMOW)	(‰ SMOW)	(ºC)	(ºC)	paleolat (ºN)	paleolat + (ºN)	paleolat - (ºN)	paleolat (ºN)	palelong (ºE)	paleolat (ºN)	paleolat + (ºN)	paleolat - (ºN)
Kuwajima	Kusuhashi 2008	36.3	136.6	Barremian–early Aptian	124	-9.2	1.8	10	4	43.2	8.2	7.8	56.1	154.5	unconstrained
Fuxin	Li et al., 2005	41.5	122	Aptian–Albian	113	-10.3	1.6	8	3	42.1	6.6	6.5	53.7	132.4	44.04	3.2	2.9
Shahai	Li et al., 2005	41.5	122	Aptian–Albian	113	-10	0.7	9	1	42.1	6.6	6.5	53.7	132.4	44.04	3.2	2.9
Yixian	Chang et al., 2009	41.6	120.8	Barremian–early Aptian	126	-9.2	1.8	10	4	41.9	6.6	6.6	56.6	132.5	48.34	5.9	5.3
Xinminpu	Tang et al., 2001	41.9	98.4	Aptian–Albian	113	-7	2.9	15	6	35.2	6.4	6.6	49.6	104.7	40.58	3.2	3
Khok Kruat	Buffetaut et al., 2009	17	104	Aptian	119	-6.7	2.8	15	6	24.3	1.9	1.8	29.1	117.1	unconstrained
Sao Khua	Buffetaut et al., 2009	17	104	Barremian?	127	-4.9	0.5	19	1	24.3	1.9	1.8	31.1	117.9	unconstrained
Napai	Buffetaut et al., 2009	23.2	108.2	Aptian?	119	-4.9	2.5	19	5	21	7.2	7.2	34.2	123.5	24.3	2.7	2.6
Xinminpu	this study	40.63	98.29	Aptian-Albian	113	-9.47	1.5	14.9	2.4	35.2	6.4	6.6	48.36	105.11	39.33	3.2	2.99

## Sheet: Table S2
Table S2. Sample information and stable light isotope data (δ13C and δ18O) for Site WP2011. Secondary/spar data italicized and not used in mean or standard deviation calculation.
	Composite section	Carbonate (this study; measured at KU)							Corg (Suarez et al., 2018)	Δδ13C (‰ VPDB)
Sample	(meters above base)	δ13C (‰ VPDB)	δ18O (‰ VPDB)	n (primary carb)	δ13Cmean (‰ VPDB)	δ18Omean (‰ VPDB)	δ13Cstd dev (‰ VPDB)	δ18Ostd dev (‰ VPDB)	δ13C (‰ VPDB)	(δ13Corg- δ13Ccarb)
3-021	8.75	-6.20839	-10.894	6	-6.262	-10.8941	0.162086	0.181432	-23.14	-16.6498
		-6.25192	-10.6071
		-5.97453	-11.0009
		-6.37633	-10.799
		-6.33232	-10.9221
		-6.42852	-11.1411
		-7.85955	-12.3232
3A-097	58.75	-7.05162	-9.1784	9	-7.01563	-9.16416	0.321319	0.0794442	-22.55	-15.5344
		-6.54798	-9.16939
		-6.51751	-9.22644
		-7.35218	-9.25746
		-7.14707	-9.11234
		-6.82011	-9.23644
		-7.14605	-9.20542
		-7.15012	-9.05029
		-7.40803	-9.04128
3B-021	74.5	-3.87033	-6.65131	8	-3.85586	-6.68771	0.0607645	0.0454435	-27.48	-23.6241
		-3.92719	-6.74238
		-3.83885	-6.68333
		-3.91196	-6.69434
		-3.81651	-6.71836
		-3.81956	-6.6413
		-3.91196	-6.74438
		-3.75051	-6.62629
3E-001	103	-6.26103	-11.1129	7	-6.44534	-11.1212	0.12047	0.21274	-21.59	-14.992
		-6.41896	-11.0479
		-6.35518	-11.2768
		-6.42605	-11.2318
		-6.63257	-10.7471
		-6.50805	-11.0269
		-6.51552	-11.4055
		-7.7492	-9.9715
		-6.51552	-10.46
3F-019	111.25	-7.34914	-10.5575	9	-7.4482	-10.189	0.10372	0.187238	-22.1119	-14.6637
		-7.2415	-10.0861
		-7.48317	-10.3354
		-7.47099	-10.1242
		-7.46896	-10.3414
		-7.43951	-10.0181
		-7.59588	-10.0781
		-7.54511	-10.1802
		-7.43951	-9.98006
3H-014	123	-6.36993	-8.25779	7	-6.33089	-8.42516	0.154152	0.215909	-21	-14.6691
		-6.11702	-8.56294
		-6.35774	-8.18975
		-6.24093	-8.58395
		-6.61674	-8.72703
		-6.34961	-8.18275
		-6.26429	-8.4719
6-003	141	-7.45403	-10.233	9	-7.06932	-10.3526	0.312787	0.275109	-25.04	-17.9707
		-7.26878	-10.1452
		-6.842	-10.4257
		-6.93002	-10.5528
		-7.12243	-10.5952
		-6.78673	-10.6447
		-7.27185	-10.0564
		-7.41104	-9.90402
		-6.53701	-10.6164
6-042	150.9	-6.60508	-9.2359	11	-6.36162	-9.46362	0.27029	0.272325	-21.97	-15.6084
		-6.61115	-10.0006
		-6.27955	-9.67772
		-6.01973	-9.25589
		-6.6344	-9.87065
		-6.0268	-9.29587
		-6.56363	-9.45881
		-6.18047	-9.44281
		-6.10667	-9.41483
		-6.73448	-9.20991
		-6.21586	-9.2369
4-038	209.85	-7.52785	-10.2623	6	-7.60502	-10.2138	0.0857698	0.112716	-25.3274	-17.7224
		-7.55831	-10.1602
		-7.50754	-10.1022
		-7.72078	-10.1292
		-7.66696	-10.2183
		-7.64868	-10.4104

## Sheet: Table S3
Table S3. Stable light isotope (δ13C and δ18O), "clumped" isotope (Δ47), and temperature data for White Pagoda Site primary carbonate measured at CU Boulder.
	Composite section		Stable light isotopes (‰ VPDB)						Clumped isotopes (following Petersen et al., 2019)					Clumped isotopes (following Bonifacie et al., 2017)					Clumped isotopes (Ghosh et al., 2006; Henkes et al., 2013)					Clumped isotopes (Ghosh et al., 2006; Defliese et al., 2015)
Sample	(meters above base)	n	δ13C	δ18O	δ13Cmean	δ18Omean	δ13Cstd dev	δ18Ostd dev	Δ47	Δ47 mean	Δ47 std dev	T (ºC)	T uncert. (+/- 1sd; ºC)	Δ47	Δ47 mean	Δ47 std dev	T (ºC)	T uncert. (+/- 1sd; ºC)	Δ47	Δ47 mean	Δ47 std dev	T (ºC)	T uncert. (+/- 1sd; ºC)	Δ47	Δ47 mean	Δ47 std dev	T (ºC)	T uncert. (+/- 1sd; ºC)
3-021	8.75	4	-5.96386	-10.8748	-5.95353	-10.9913	0.0804665	0.163726	0.75242	0.731379	0.0159696	11.4	4.76445	0.66442	0.643379	0.0159696	12.6	4.35383	0.75642	0.735379	0.0159696	20	3.16373	0.74642	0.725379	0.0159696	22	3.24487
			-6.02162	-10.9585					0.713622					0.625622					0.717622					0.707622
			-5.99048	-11.2312					0.72882					0.64082					0.73282					0.72282
			-5.83814	-10.9006					0.730656					0.642656					0.734656					0.724656
3A-097	58.75	3	-6.7707	-9.35722	-6.75574	-9.30168	0.0256189	0.171291	0.710793	0.7165	0.00882597	15.9	2.77849	0.622793	0.6285	0.00882597	16.7	2.5482	0.714793	0.7205	0.00882597	23	1.82483	0.704793	0.7105	0.00882597	25.1	1.82483
			-6.77036	-9.10952					0.726666					0.638666					0.730666					0.720666
			-6.72616	-9.43832					0.712042					0.624042					0.716042					0.706042
3B-021	74.5	4	-3.63577	-7.20004	-3.6667	-6.98227	0.0401293	0.399225	0.723411	0.719288	0.00736439	15	2.31661	0.635411	0.631288	0.00736439	15.9	2.07364	0.727411	0.723288	0.00736439	22.5	1.48212	0.717411	0.713288	0.00736439	24.5	1.5384
			-3.70289	-6.4276					0.712566					0.624566					0.716566					0.706566
			-3.62836	-7.33281					0.727556					0.639556					0.731556					0.721556
			-3.69979	-6.96862					0.713618					0.625618					0.717618					0.707618
3E-001	103	4	-6.14269	-11.2449	-5.98259	-10.9827	0.115143	0.341569	0.721444	0.732429	0.0136141	11.1	4.03361	0.633444	0.644429	0.0136141	12.3	3.70225	0.754884	0.736429	0.0136141	19.8	2.68126	0.744884	0.726429	0.0136141	21.8	2.72641
			-5.98196	-10.6706					0.734474					0.646474					0.725444					0.715444
			-5.92955	-11.3099					0.722911					0.634911					0.738474					0.728474
			-5.87615	-10.7055					0.750884					0.662884					0.726911					0.716911
3F-019	111.25	4	-6.95298	-10.6265	-7.04714	-10.3797	0.0682748	0.311815	0.714654	0.719348	0.0137013	15.1	4.28826	0.626654	0.631348	0.0137013	15.9	3.92035	0.718654	0.723348	0.0137013	22.5	2.78867	0.708654	0.713348	0.0137013	24.5	2.83005
			-7.10932	-10.3564					0.733522					0.645522					0.737522					0.727522
			-7.08238	-9.9476					0.702457					0.614457					0.706457					0.696457
			-7.04387	-10.5883					0.726758					0.638758					0.730758					0.720758
3H-014	123	4	-5.90646	-8.74525	-5.94858	-8.63271	0.0801805	0.173935	0.720177	0.716699	0.0109032	15.9	3.45012	0.632177	0.628699	0.0109032	16.7	3.15529	0.724177	0.720699	0.0109032	23.2	2.23084	0.714177	0.710699	0.0109032	25	2.26918
			-6.01198	-8.41571					0.714002					0.626002					0.718002					0.708002
			-5.85649	-8.79796					0.703329					0.615329					0.707329					0.697329
			-6.01939	-8.57192					0.729289					0.641289					0.733289					0.723289
6-003	141	4	-6.83695	-10.2124	-6.85624	-10.3159	0.0164171	0.134141	0.698012	0.707373	0.0066303	18.8	2.19393	0.610012	0.619373	0.0066303	19.4	1.97821	0.702012	0.711373	0.0066303	24.9	1.35984	0.692012	0.701373	0.0066303	27	1.40712
			-6.86267	-10.2211					0.713116					0.625116					0.717116					0.707116
			-6.87517	-10.3293					0.707643					0.619643					0.711643					0.701643
			-6.85017	-10.5006					0.710721					0.622721					0.714721					0.704721
6-042	150.9	4	-6.25644	-9.35845	-6.26588	-9.60162	0.0220208	0.304277	0.710006	0.722983	0.0210137	14	6.25193	0.622006	0.634983	0.0210137	15	5.77754	0.714006	0.726983	0.0210137	21.8	4.13159	0.704006	0.716983	0.0210137	23.8	4.23084
			-6.27422	-10.0313					0.75428					0.66628					0.75828					0.74828
			-6.24098	-9.41728					0.715948					0.627948					0.719948					0.709948
			-6.29188	-9.59943					0.711699					0.623699					0.715699					0.705699
4-038	209.85	4	-7.24121	-10.4252	-7.23714	-10.3163	0.0409179	0.131117	0.732222	0.714918	0.0138143	16.5	4.38824	0.644222	0.626918	0.0138143	17.3	3.99708	0.736222	0.718918	0.0138143	23.3	2.81943	0.726222	0.708918	0.0138143	25.4	2.90631
			-7.25985	-10.3879					0.718954					0.630954					0.722954					0.712954
			-7.1783	-10.1304					0.700434					0.612434					0.704434					0.694434
			-7.2692	-10.3216					0.708061					0.620061					0.712061					0.702061

## Sheet: Table S4
Table S4. Lithologic, X-Ray Flourescence (XRF), CALMAG and CIA-K (see text) data, with interpreted mean annual precipiation (MAP) for all White Pagoda Site samples. B horizon samples noted.
	Composite section			XRF (mass %)			CALMAG	MAP	CIA-K	MAP
Sample	(meters above base)	Lithology	Paleosol B-horizon?	MgO	Al2O3	CaO	(%)	(mm/yr; CALMAG)	(%)	(mm/yr; CIA-K)
WP2011-3-001	0	mudstone		3.266	17.085	1.196	62.0857	972.924	76.1498	991.05
WP2011-3-005	1	mudstone		3.053	17.849	0.838	65.8807	1059.03	77.4883	1017.53
WP2011-3-009	5.62	coarse sandstone		1.919	13.882	0.751	69.0643	1131.27	67.0338	828.139
WP2011-3-015	7.25	coarse mudstone		2.504	15.565	0.956	65.8553	1058.46	71.2142	899.226
WP2011-3-015_dup	7.25	coarse mudstone		2.397	15.385	0.948	66.4004	1070.83	71.066	896.604
WP2011-3-020	8.5	mudstone		2.677	12.756	11.929	30.9508	266.473	33.7018	429.465
WP2011-3-021	8.75	mudstone	B-horizon	3.251	15.117	2.159	55.4481	822.317	63.2725	768.993
WP2011-3-027	10.25	mudstone		2.877	16.481	1.013	64.3839	1025.07	69.4377	868.3
WP2011-3-030	11	coarse sandstone		2.649	15.903	0.601	67.1171	1087.09	70.8042	891.992
WP2011-3-034	12	coarse mudstone		1.782	12.213	4.018	50.8357	717.662	39.5344	481.759
WP2011-3-035	12.25	mudstone	B-horizon	1.539	13.041	5.657	47.9134	651.355	44.9896	536.416
WP2011-3-036	12.5	fine sandstone	B-horizon	1.459	10.737	3.856	50.086	700.651	28.6511	388.791
WP2011-3-037	12.75	mudstone		1.059	7.016	21.29	14.4954	N/A	12.8617	284.858
WP2011-3-043	14.25	mudstone	B-horizon	2.665	14.515	3.093	54.0041	789.552	62.2736	754.009
WP2011-3-046	15	mudstone		2.824	17	0.813	66.356	1069.82	74.0708	951.282
WP2011-1-016	39	mudstone		2	13.795	2.628	58.3778	888.793	61.5865	743.872
WP2011-3A-058	47.75	mudstone		2.562	16.36	0.6	68.3673	1115.45	73.606	942.611
WP2011-2-019	48.3	siltstone		2.629	14.823	1.035	63.474	1004.42	70.1954	881.359
WP2011-3A-063	49	limestone		1.142	5.694	28.594	9.40083	N/A	8.61329	261.988
WP2011-3A-064	49.25	silty mudstone		2.351	13.182	5.372	45.6218	599.359	46.0862	548.13
WP2011-3A-069	50.5	mudstone	B-horizon	2.381	12.723	7.008	40.4093	481.086	42.7432	513.195
WP2011-3A-071	51	mudstone	B-horizon	2.557	14.791	7.003	43.5166	551.591	48.34	573.015
WP2011-2-029	53.05	sandy siltstone		2.579	14.381	1.302	61.8009	966.463	69.7186	873.119
WP2011-3A-080	53.25	siltstone		2.504	16.623	0.726	68.4779	1117.96	72.7584	927.002
WP2011-3A-081	53.5	sandstone		0.675	7.313	14.919	20.2327	23.2806	19.5671	325.085
WP2011-3A-085	55.75	mudstone	B-horizon	2.475	14.814	7.104	43.5852	553.148	47.362	562.081
WP2011-3A-091	57.25	mudstone	B-horizon	2.827	16.605	1.535	62.555	983.573	70.977	895.033
WP2011-3A-097	58.75	mudstone	B-horizon	2.692	14.472	6.745	43.1451	543.162	48.1835	571.252
WP2011-3A-100	59.5	mudstone	B-horizon	2.754	15.248	3.327	53.954	788.416	61.117	737.023
WP2011-3B-001	69.5	mudstone		2.509	14.944	1.889	60.4455	935.708	68.2924	848.929
WP2011-3B-005	70.5	fine sandstone		1.42	11.581	0.999	68.171	1111	64.2679	784.223
WP2011-3B-009	71.5	mudstone	B-horizon	3.024	15.536	1.051	61.9116	968.974	72.918	929.921
WP2011-3B-014	72.75	mudstone	B-horizon	3.021	15.104	0.844	62.2129	975.812	72.3677	919.894
WP2011-3B-016	73.25	medium sandstone		2.48	13.093	1.097	61.3002	955.101	62.6279	759.291
WP2011-3B-017	73.5	mudstone		2.841	12.861	0.971	58.9667	902.154	60.7028	731.034
WP2011-3B-021	74.5	mudstone		9.274	9.961	9.476	19.6697	10.506	32.9889	423.476
WP2011-3B-023	75	mudstone	B-horizon	4.763	13.106	2.175	45.0302	585.934	58.8672	705.071
WP2011-3B-024	75.25	mudstone	B-horizon	3.524	13.255	4.727	43.0908	541.93	51.2831	607.221
WP2011-3C-026	87.05	mudstone		2.859	10.104	15.736	21.9922	63.2022	24.2075	356.204
WP2011-3C-030	88	mudstone		3.556	14.703	4.045	47.3533	638.646	57.0507	680.287
WP2011-3C-033	88.75	mudstone		3.555	12.489	10.988	30.1257	247.753	34.7599	438.511
WP2011-3C-035	89.25	mudstone		3.787	12.929	7.736	35.3537	366.376	42.416	509.897
WP2011-3C-036	89.5	limestone		0.977	1.818	46.189	2.05969	N/A	2.07251	230.314
WP2011-3C-038	90	mudstone		3.064	11.14	15.004	24.1297	111.703	26.5934	373.346
WP2011-3C-039	90.25	mudstone		3.493	14.948	3.642	49.1669	679.797	57.1674	681.853
WP2011-3D-043	101.75	mudstone		2.601	13.041	10.604	33.5265	324.915	35.6176	445.984
WP2011-3E-001	103	mudstone		2.57	12.676	10.191	33.6203	327.045	35.4789	444.766
WP2011-3E-005	104	mudstone		2.863	15.502	4.433	50.3286	706.156	55.4522	659.197
WP2011-3E-010	105.25	mudstone	B-horizon	2.532	13.94	6.502	43.3401	547.586	40.1057	487.211
WP2011-3E-014	106.25	mudstone		3.065	16.23	0.599	64.7394	1033.14	63.9859	779.877
WP2011-3F-001	106.5	mudstone	B-horizon	3.185	13.811	6.212	41.6505	509.25	47.1365	559.59
WP2011-3F-005	107.5	mudstone		2.998	16.545	1.423	61.9351	969.508	71.1923	898.839
WP2011-3F-012	109.25	sandstone		1.612	12.038	1	67.1295	1087.37	60.5826	729.304
WP2011-3F-015	110.25	mudstone	B-horizon	2.898	14.723	2.709	54.5768	802.548	63.1257	766.773
WP2011-3F-022	112	sandstone		2.815	14.394	2.569	54.9741	811.563	59.2925	711.004
WP2011-3F-026	113	mudstone		2.89	13.253	7.078	39.6443	463.729	44.6779	533.133
WP2011-3F-030	114	mudstone		2.885	13.764	1.908	56.1144	837.435	55.5364	660.292
WP2011-3F-035	115.25	mudstone		3.054	15.452	2.552	55.5534	824.706	64.5724	788.941
WP2011-3G-001	116.25	sandstone		2.769	13.662	0.913	61.1984	952.792	64.9585	794.964
WP2011-3G-003	116.75	mudstone	B-horizon	3.017	14.106	5.106	45.4759	596.049	51.64	611.505
WP2011-3G-010	118.5	mudstone		2.631	12.882	11.769	31.4712	278.282	34.3742	435.192
WP2011-3G-011	118.75	calcrete		2.117	7.054	30.526	10.3877	-200.103	10.9334	274.24
WP2011-3H-001	119.75	mudstone	B-horizon	3.494	15.023	3.37	50.1008	700.986	62.4052	755.967
WP2011-3H-007	121.25	mudstone	B-horizon	3.231	16.282	2.15	57.409	866.81	68.2273	847.841
WP2011-3H-010	122	mudstone	B-horizon	3.246	16.694	1.517	60.3533	933.616	74.4721	958.831
WP2011-3H-014	123	claystone	B-horizon	3.15	15.733	2.659	55.1397	815.319	66.9007	825.97
WP2011-3H-018	124	mudstone		2.768	15.986	1.567	61.8782	968.216	71.0224	895.836
WP2011-3H-022	125	sandstone		1.93	12.985	1.117	65.2632	1045.02	57.1409	681.496
WP2011-3H-024	125.5	mudstone		2.73	16.07	0.655	66.5028	1073.15	71.9737	912.781
WP2011-6-003	141	silty mudstone	B-horizon	3.16	14.137	3.889	48.4168	662.776	57.8667	691.31
WP2011-6-014	143.75	sandy siltstone	B-horizon	2.606	12.911	5.361	44.1433	565.812	47.6111	564.846
WP2011-6-016	144.25	sandy siltstone		2.25	10.179	13.585	25.0913	133.522	26.624	373.571
WP2011-6-018	144.75	sandy siltstone		2.436	10.75	12.254	27.431	186.609	26.8611	375.32
WP2011-6-022	145.75	silty mudstone		2.934	14.506	4.957	46.8876	628.08	54.4943	646.874
WP2011-6-026	146.75	sandy siltstone		2.519	14.297	3.503	52.8817	764.085	59.4965	713.867
WP2011-6-030	147.9	mudstone	B-horizon	2.159	13.321	3.484	53.0402	767.681	55.657	661.863
WP2011-6-032	148.4	mudstone		2.952	15.355	4.702	48.95	674.877	57.6471	688.326
WP2011-6-035	149.15	mudstone	B-horizon	2.999	15.735	3.528	52.9208	764.973	64.2717	784.282
WP2011-6-042	150.9	carb. mudstone	B-horizon	3.034	14.796	7.025	41.9857	516.856	49.0302	580.86
WP2011-6-047	152.15	carb. mudstone	B-horizon	2.924	14.939	3.161	53.2012	771.335	61.9803	749.665
WP2011-4-038	209.85	silty mudstone		1.34	9.312	25.399	15.8155	N/A	16.2108	304.286
WP2011-4-042	210.85	mudstone	B-horizon	1.826	14.047	8.967	40.1715	475.691	41.6243	502.007
WP2011-4-045	211.6	mudstone		2.062	14.187	3.27	55.9721	834.206	53.1265	629.677
WP2011-4-052	213.2	mudstone		0.901	4.817	37.819	6.35029	N/A	6.40614	250.84
WP2011-4-070	218.2	mudstone		3.126	14.139	13.4	30.4676	255.509	33.1252	424.615
WP2011-4-073	218.95	mudstone		3.399	16.216	2.217	56.2235	839.91	67.1411	829.892
WP2011-4-077	219.95	mudstone	B-horizon	2.705	14.493	4.235	49.919	696.862	55.5154	660.018
WP2011-4-081	220.95	muddy sandstone	B-horizon	1.578	12.983	4.465	51.7431	738.25	48.3118	572.697
WP2011-4-085	221.95	muddy sandstone	B-horizon	1.06	13.173	3.661	58.5216	892.056	51.8033	613.476

## Sheet: Clumped isotope Methodology
Sample Preparation Information
Method of Preparing Powder	drilled	text string		crushed, milled, filtered, etc.
Sample Preparation System	AIL	text string	acronym	MOL = manual off-line, AKD = Automated Kiel Device, AOL = Automated Off-line, AIL = Automated in-line (e.g. "Passey device")
Acid digestions method	CAB	text string	acronym	CAB = common acid bath, MCR = McCrea vessel, IND = (Kiel) individual reaction vessels, etc.
Acid temperature	90	numeric	ºC
Acid density	1.53	numeric	g/cm^3
Reaction time	45	numeric	minutes
Porapak temperature	-20	numeric	ºC
Porapak method	He-PPQ	text string	abbreviation	GC, staticPPQ = single U-trap, no He-carrier gas, He-PPQ = self-packed PPQ with He-carrier gas
Silver wool used?	Y	text string	Y or N
Other clean up steps		text string
Mass Spectrometric Analysis
Mass Spec ID	Bert	text string
Location/owner of Mass Spec	CUBESSIL	text string
Instrument Model	253plus	text string
Cycles per acquisition	7	numeric	cycles/acq
Acquisitions per replicate	9	numeric	acq/rep
Integration time	24	numeric	s
Centering m/z	45	numeric	m/z
Volatage on m/z 44	10	numeric	V
LIDI method used?	N	text string	Y or N
Background correction used?	Y	text string	Y or N
Background correction method?	every acq	text string
Standard Values
Name of Parameter Set	Brand/IUPAC	text string		e.g. "Santrock/Gonfiantini (SG)"
R13_VPDB	0.01118	numeric	unitless	e.g. 0.0112372 (Santrock/Gonfiantini) or 0.01118 (Brand/IUPAC)
R18_VSMOW	0.0020052	numeric	unitless	e.g. 0.0020052 (Santrock/Gonfiantini or Brand/IUPAC)
R17_VSMOW	0.00038475	numeric	unitless	e.g. 0.0003799 (Santrock/Gonfiantini) or 0.00038475 (Brand/IUPAC)
Lambda (or beta)	0.528	numeric	unitless	e.g. 0.5164 (Santrock/Gonfiantini) or 0.528 (Brand/IUPAC)
Data reduction
Reference frame calculation method	LFW	text string	acronym	LFW = long fixed window, VMW = variable-length moving window, FMW = fixed length moving window, DM = daily modeled values (polynomial fit)
Gas standards used in ARF corrections?	Y	text string	Y or N	ARF = absolute reference frame, does not need to be exclusively gas standards
Carb standards used in ARF corrections?	N	text string	Y or N	ARF = absolute reference frame, does not need to be exclusively carb standards
Comments on ARF correction		text string		information about choice of correction windows or how they are defined (by date, by Day #)
Additional corrections?	Carbonate standard correction after gas standards, scale correction to final bulk d13C and d18O values	text string		porapak fractionation, d18O or d13C offset, etc.
Long-term reproducability (1sd)	0.04	numeric	permil	1 standard deviation of sample or carbonate standards run many times over a long interval, for calculating external error
Additional information
Related publication citation for method		text string
Any other information		text string

## Sheet: References
References cited in tables and captions.
Amiot, R., Wang, X., Zhou, Z., Wang, X., Buffetaut, E., Lecuyer, C., Ding, Z., Fluteau, F., Hibino, T., Kusuhashi, N., Mo, J., Suteethorn, V., Wang, Y., Xu, X., and Zhang, F.: Oxygen isotopes of East Asian dinosaurs reveal exceptionally cold Early Cretaceous climates, Proc Natl Acad Sci U S A, 108, 5179-5183, 10.1073/pnas.1011369108, 2011.
Bonifacie, M., Calmels, D., Eiler, J. M., Horita, J., Chaduteau, C., Vasconcelos, C., Agrinier, P., Katz, A., Passey, B. H., Ferry, J. M., and Bourrand, J.-J.: Calibration of the dolomite clumped isotope thermometer from 25 to 350 °C, and implications for a universal calibration for all (Ca, Mg, Fe)CO3 carbonates, Geochimica et Cosmochimica Acta, 200, 255-279, 10.1016/j.gca.2016.11.028, 2017.
Bralower, T. J., CoBabe, E., Clement, B., Sliter, W. V., Osburn, C. L., and Longoria, J.: The record of global change in mid-Cretaceous (Barremian-Albian) sections from the Sierra Madre, Northeastern Mexico, Journal of Foraminiferal Research, 29, 20, 1999.
Buffetaut, E., Suteethorn, V., and Tong, H.: An early 'ostrich dinosaur' (Theropoda: Ornithomimosauria) from the Early Cretaceous Sao Khua Formation of NE Thailand, Geological Society, London, Special Publications, 315, 229-243, 10.1144/sp315.16, 2009.
Chang, S.-c., Zhang, H., Renne, P. R., and Fang, Y.: High-precision 40Ar/39Ar age constraints on the basal Lanqi Formation and its implications for the origin of angiosperm plants, Earth and Planetary Science Letters, 279, 212-221, 10.1016/j.epsl.2008.12.045, 2009.
Cotton, J. M., and Sheldon, N. D.: New constraints on using paleosols to reconstruct atmospheric pCO2, Geological Society of America Bulletin, 124, 1411-1423, 10.1130/b30607.1, 2012.
Defliese, W. F., Hren, M. T., and Lohmann, K. C.: Compositional and temperature effects of phosphoric acid fractionation on Δ47 analysis and implications for discrepant calibrations, Chemical Geology, 396, 51-60, 10.1016/j.chemgeo.2014.12.018, 2015.
Friedman, I., and O’Neil, J. R.: Compilation of stable isotope fractionation factors of geochemical interest, in: Data of Geochemistry, 6 ed., edited by: Fleischer, M., US Government Printing Office, 1977.
Ghosh, P., Adkins, J., Affek, H., Balta, B., Guo, W., Schauble, E. A., Schrag, D., and Eiler, J. M.: 13C–18O bonds in carbonate minerals: A new kind of paleothermometer, Geochimica et Cosmochimica Acta, 70, 1439-1456, 10.1016/j.gca.2005.11.014, 2006.
Henkes, G. A., Passey, B. H., Wanamaker, A. D., Grossman, E. L., Ambrose, W. G., and Carroll, M. L.: Carbonate clumped isotope compositions of modern marine mollusk and brachiopod shells, Geochimica et Cosmochimica Acta, 106, 307-325, 10.1016/j.gca.2012.12.020, 2013.
Kusuhashi, N.: Early Cretaceous Multituberculate Mammals from the Kuwajima Formation (Tetori Group), Central Japan, Acta Palaeontologica Polonica, 53, 379-390, 10.4202/app.2008.0302, 2008.
Li, C., Setoguchi, T., Yuanqing, W., Yaoming, H., and Zhenglu, C.: The first record of “eupantotherian” (Theria, Mammalia) from the late Early Cretaceous of western Liaoning, China, Vertebrata Pal Asiatica 43, 11, 2005.
Matthews, K. J., Maloney, K. T., Zahirovic, S., Williams, S. E., Seton, M., and Müller, R. D.: Global plate boundary evolution and kinematics since the late Paleozoic, Global and Planetary Change, 146, 226-250, 10.1016/j.gloplacha.2016.10.002, 2016.
Petersen, S. V., Defliese, W. F., Saenger, C., Daëron, M., Huntington, K. W., John, C. M., Kelson, J. R., Bernasconi, S. M., Colman, A. S., Kluge, T., Olack, G. A., Schauer, A. J., Bajnai, D., Bonifacie, M., Breitenbach, S. F. M., Fiebig, J., Fernandez, A. B., Henkes, G. A., Hodell, D., Katz, A., Kele, S., Lohmann, K. C., Passey, B. H., Peral, M. Y., Petrizzo, D. A., Rosenheim, B. E., Tripati, A.…
Romanek, C. S., Grossman, E. L., and Morse, J. W.: Carbon isotopic fractionation in synthetic aragonite and calcite: effects of temperature and precipitation rate, Geochimica et Cosmochimica Acta, 56, 12, 1992.
Suarez, M. B., Milder, T., Peng, N., Suarez, C. A., You, H., Li, D., and Dodson, P.: Chemostratigraphy of the Lower Cretaceous dinosaur-bearing Xiagou and Zhonggou Formations, Yujingzi Basin, Northwest China, Journal of Vertebrate Paleontology, 38, 10.1080/02724634.2017.1510412, 2018.
Tang, F., Luo, Z. X., Zhou, Z. H., You, H. L., Georgi, J. A., Tang, Z. L., and Wang, X. Z.: Biostratigraphy and palaeoenvironment of the dinosaur-bearing sediments in Lower Cretaceous of Mazongshan area, Gansu Province, China, Cretaceous Research, 22, 115-129, 10.1006/cres.2000.0242, 2001.
Torsvik, T. H., VanderVoo, R., Preeden, U., MacNiocaill, C., Steinberger, B., Doubrovine, P. V., vanHinsbergen, D. J. J., Domeier, M., Gaina, C., Tovher, E., Meert, J. G., McCausland, P. J., and Cocks, L. R. M.: Phanerozoic polar wander, paleogeography and dynamics, Earth-Science Reviews, 114, 44, 2012.
